# Supplementary material
Source: publisher figshare collection journal article supplement (https://frontiersin.figshare.com/ndownloader/files/24453128)
Supplement: Supplementary file 1 [file 24453128]

ISCN Data Citations:

Soil Survey Staff, 2014. National Cooperative Soil Characterization Data. Soil Survey Laboratory, National Soil Survey Center, USDA-Natural Resources Conservation Service, Lincoln, NE. . Accessed 9 September 2014.

G.R. Buell, H.W. Markewich, R. Kulisek, S. Pollard, and T.T. Cook. Site-Specific Soil-Carbon (S3C) Database for Mineral Soils of the Mississippi River Basin, USA. USGS Open File Report 2004-1227.

Zinke P.J., Stangenberger A.G., Post W.M., Olson J.S. 1986. Worldwide soil carbon and nitrogen data. NDP-018, Carbon Dioxide Information Center, Oak Ridge National Laboratory, Oak Ridge, TN. doi:10.3334/CDIAC/lue.ndp018

Heckman K, Welty-Bernard A, Rasmussen C, Schwartz E, 2009. Geologic controls of soil carbon cycling and microbial dynamics in temperate forests. Chemical Geology 267, 12-23.

Harden J, Fries T, Huntington T. 1999. MS Basin Carbon Project: Upland soil database for sites in Yazoo Basin, northern MS. USGS Open file report 99-319.

Ping, C.L., Michaelson, G.J., Kane, E.S., Packee, E.C., Stiles, C.A., Swanson, D.K., Zaman, N.D., 2010. Carbon stores and biogeochemical properties of soils under black spruce forest, Alaska. Soil Science Society of America Journal 74(3), 969.

Bockheim, J., Walker, D., Everett, L., Nelson, F., Shiklomanov, N., 1998. Soils and cryoturbation in moist nonacidic and acidic tundra in the Kuparuk River Basin, arctic Alaska, USA. Arctic and Alpine Research 30(2), 166-174.

Bockheim, J., Hinkel, K., Eisner, W., Dai, X., Peterson, K., 2004. Carbon pools and accumulation rates in an age-series of soils in drained thaw-lake basins, Arctic Alaska. Soil Science Society of America Journal 68(2), 697-704.

Bockheim, J.G., Hinkel, K.M., Nelson, F.E., 2001. Soils of the Barrow region, Alaska. Polar Geography 25(3), 163-181.

Bockheim, J.G., Everett, L., Hinkel, K.M., Nelson, F.E., Brown, J., 1999. Soil Organic Carbon Storage and Distribution in Arctic Tundra, Barrow, Alaska. Soil Science Society of America Journal 63, 934-940.

Bockheim, J.G., Hinkel, K.M., Nelson, F.E., 2003. Predicting carbon storage in tundra soils of arctic Alaska. Soil Science Society of America Journal 67, 948-950.

Yarie, John. 1998. Soil physical and chemical properties based on genetic horizon from 4 replicate pits placed around the replicate LTER control plots sampled in 1988 and 1989., Bonanza Creek LTER - University of Alaska Fairbanks. BNZ:134, http://www.lter.uaf.edu/data_detail.cfm?datafile_pkey=134.

Van Cleve, K., Dyrness, C.T., Marion, G.M., Erickson, R., 1993. Control of soil development on the Tanana River floodplain, interior Alaska. Canadian Journal of Forest Research 23, 941-955.

Harden, Jennifer. 2008. Delta Junction fire-chronosequence soil database: carbon, nitrogen, bulk density, and other properties, Bonanza Creek LTER - University of Alaska Fairbanks. BNZ:336, http://www.lter.uaf.edu/data_detail.cfm?datafile_pkey=336.

O’Donnell, J., Harden, J., McGuire, A., Kanevskiy, M., Jorgenson, M., Xu, X., 2011. The effect of fire and permafrost interactions on soil carbon accumulation in an upland black spruce ecosystem of interior Alaska: implications for post-thaw carbon loss. Global Change Biology 17, 1461-1474.

Manies, K.L., Survey, G., 2004. Soil data from Picea mariana stands near Delta Junction, Alaska of different ages and soil drainage type, US Geological Survey Open File Report 2004-1271. US Geological Survey.

Harden, Jennifer. 2008. Bonanza Creek moisture gradient soil core data: 2004., Bonanza Creek LTER - University of Alaska Fairbanks. BNZ:334, http://www.lter.uaf.edu/data_detail.cfm?datafile_pkey=334.

Harden, J.W., Manies, K.L., Turetsky, M.R., Neff, J.C., 2006. Effects of wildfire and permafrost on soil organic matter and soil climate in interior Alaska. Global Change Biology 12(12), 2391-2403.

Neff, J., Harden, J., Gleixner, G., 2005. Fire effects on soil organic matter content, composition, and nutrients in boreal interior Alaska. Canadian Journal of Forest Research 35(9), 2178-2187.

Ping, C.L., Michaelson, G.J., Packee, E.C., Stiles, C.A., Swanson, D.K., Yoshikawa, K., 2005. Soil catena sequences and fire ecology in the boreal forest of Alaska. Soil Science Society of America Journal 69(6), 1761.

Ping, Chien-Lu. 2000. Soil Horizon Descriptions/Classification and Lab Analysis, Bonanza Creek LTER - University of Alaska Fairbanks. BNZ:149, http://www.lter.uaf.edu/data_detail.cfm?datafile_pkey=149.

Ping, C.L., Michaelson, G.J., Kimble, J.M., Everett, L.R., 2002. Organic carbon stores in Alaska soils. In: R. Lal, J.M. Kimble, R. Follet (Eds.), Agricultural Practices and Policies of Carbon Sequestration in Soils. Lewis Publishers, Boca Raton, LA, pp. 485–494.

Michaelson, G.J., Ping, C.L., Kimble, J.M., 1996. Carbon storage and distribution in tundra soils of arctic Alaska, U.S.A. Arctic and Alpine Research 28(4), 414-424.

Ping, C.L., Clark, M.H., Swanson, D.K., 2004. Cryosols in Alaska. In: J.M. Kimble (Ed.), Cryosols: Permafrost-affected soils. Springer-Verlag, Berlin, pp. 71–94.

Boby, L.A., Schuur, E.A.G., Mack, M.C., Verbyla, D., Johnstone, J.F., 2010. Quantifying fire severity, carbon, and nitrogen emissions in Alaska's boreal forest. Ecological Applications 20(6), 1633-1647.

Schuur, E.A.G., Crummer, K.G., Vogel, J.G., Mack, M.C., 2007. Plant species composition and productivity following permafrost thaw and thermokarst in Alaskan tundra. Ecosystems 10(2), 280-292.

Schuur, Edward. 2009. The impact of permafrost thaw on ecosystem carbon balance: Eight Mile Lake soil carbon and nitrogen., Bonanza Creek LTER - University of Alaska Fairbanks. BNZ:366, http://www.lter.uaf.edu/data_detail.cfm?datafile_pkey=366.

Vogel, J.G., Bond-Lamberty, B.P., Schuur, E.A.G., Gower, S.T., Mack, M.C., O'Connell, K.E.B., Valentine, D.W., Ruess, R.W., 2008. Carbon allocation in boreal black spruce forests across regions varying in soil temperature and precipitation. Global Change Biology 14(7), 1503-1516.

Kane, E.S., Vogel, J.G., 2009. Patterns of total ecosystem carbon ctorage with changes in soil temperature in boreal black spruce forests. Ecosystems 12(2), 322-335.

Vogel, Jason. 2007. Black spruce C cycling study along a temperature gradient in interior Alaska, Bonanza Creek LTER - University of Alaska Fairbanks. BNZ:304, http://www.lter.uaf.edu/data_detail.cfm?datafile_pkey=304.

Myers-Smith, Isla. 2005. Soil data for cores from a transect from the center of the BBC collapse scar into the surrounding burn, Bonanza Creek LTER - University of Alaska Fairbanks. BNZ:192, http://www.lter.uaf.edu/data_detail.cfm?datafile_pkey=192.

Myers-Smith, I.H., McGuire, A.D., Harden, J.W., Chapin III, F.S., 2007. Influence of disturbance on carbon exchange in a permafrost collapse and adjacent burned forest. Journal of Geophysical Research 112(G4), G04017.
